# Supplementary material for: A human neutralizing antibody targets the receptor-binding site of SARS-CoV-2
Source: Springer Nature journal article supplement (doi:10.1038/s41586-020-2381-y), 2020-05-26

---

**Supplementary information**

---

# **A human neutralizing antibody targets the receptor-binding site of SARS-CoV-2**

---

In the format provided by the authors and unedited

Rui Shi, Chao Shan, Xiaomin Duan, Zihai Chen, Peipei Liu, Jinwen Song, Tao Song, Xiaoshan Bi, Chao Han, Lianao Wu, Ge Gao, Xue Hu, Yanan Zhang, Zhou Tong, Weijin Huang, William Jun Liu, Guizhen Wu, Bo Zhang, Lan Wang, Jianxun Qi, Hui Feng, Fu-Sheng Wang✉, Qihui Wang✉, George Fu Gao✉, Zhiming Yuan✉ & Jinghua Yan✉

This is the original gel-picture of Extended Data Figure 2 in the article.

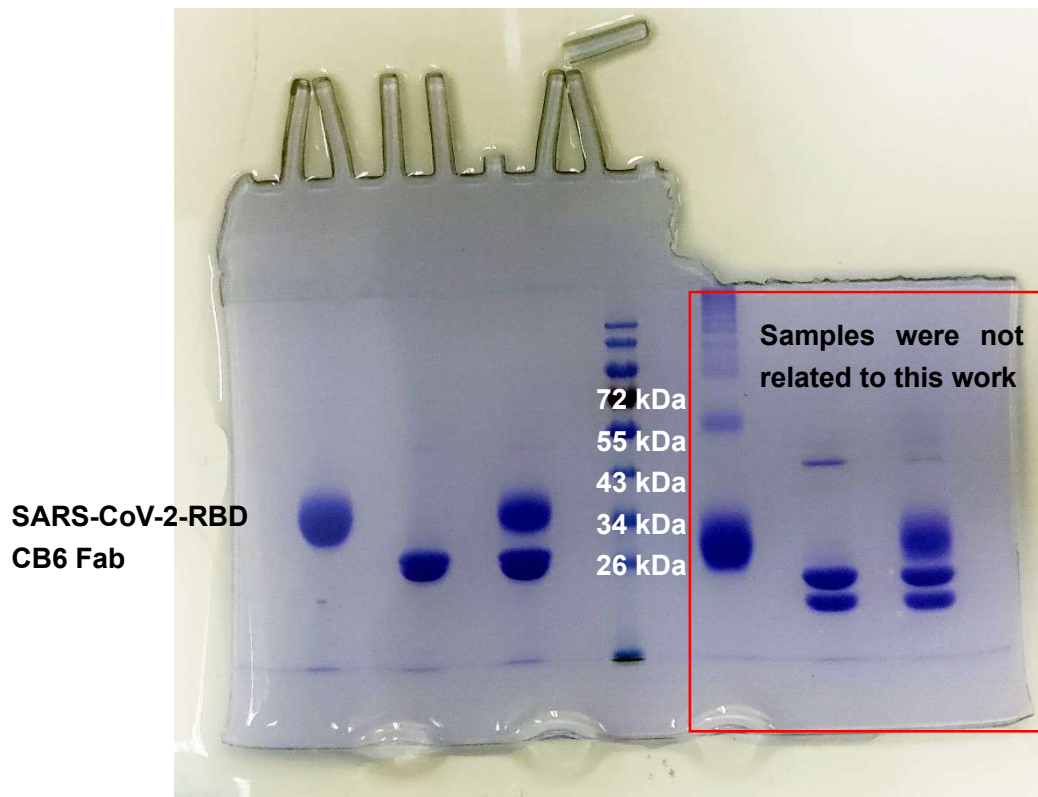

Supplement: 41586_2020_2381_MOESM1_ESM.pdf [file 41586_2020_2381_MOESM1_ESM.pdf]
